# Supplementary material for: Dynamics of the fecal microbiome in patients with recurrent and nonrecurrent Clostridium difficile infection
Source: PubMed Central journal article supplement (PMC4847246; doi:10.1186/s13073-016-0298-8), 2016-04-27

Otu01: Enterobacteriaceae

Otu03: *Bacteroides*

\*Otu12: *Clostridium XI*

Otu14: *Streptococcus*

Otu50: Bacteria (uncl.)

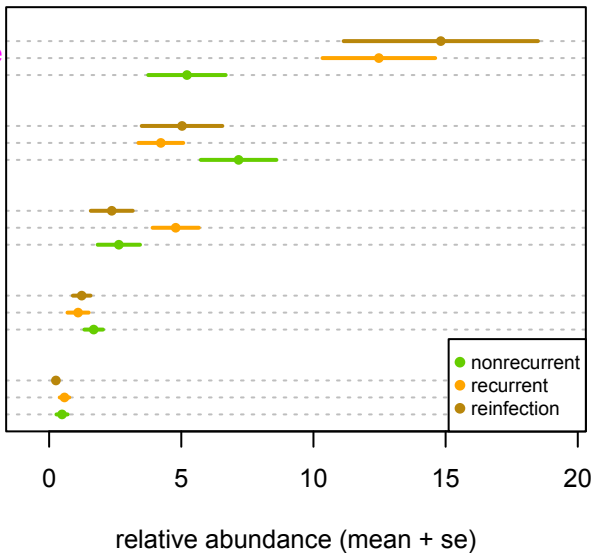

Supplement: 13073_2016_298_MOESM2_ESM.pdf [file 13073_2016_298_MOESM2_ESM.pdf]
