# Supplementary material for: Dynamics of the fecal microbiome in patients with recurrent and nonrecurrent Clostridium difficile infection
Source: PubMed Central journal article supplement (PMC4847246; doi:10.1186/s13073-016-0298-8), 2016-04-27

$\theta_{yc}$  distance  
(community dissimilarity)

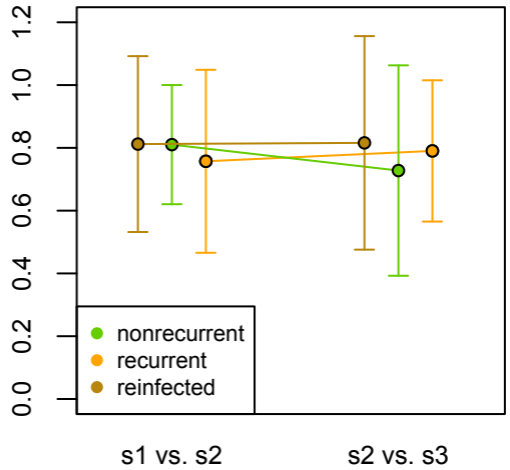

Supplement: 13073_2016_298_MOESM5_ESM.pdf [file 13073_2016_298_MOESM5_ESM.pdf]
